# Supplementary material
Source: publisher site journal article supplement (https://www.dovepress.com/article/481120)
Supplement: Supplementary file 1 [file get_supplementary_file.php]

*Supporting Information*

**Toxicity and Oxidative Stress Biomarkers in the Organs of Mice Treated with Mesoporous Polydopamine Nanoparticles Modified with Iron and Coated with Cancer Cell Membrane**

Marta Szukalska1, Bartosz F. Grześkowiak2, Magdalena J. Bigaj-Józefowska2, Marta Witkowska3,7, Emilia Cicha4, Patrycja Sujka-Kordowska5, Izabela Miechowicz6, Michał Nowicki5, Radosław Mrówczyński3,7, Ewa Florek1

1Laboratory of Environmental Research, Department of Toxicology, Poznan University of Medical Sciences, Poznań, Poland

2NanoBioMedical Centre, Adam Mickiewicz University, Poznań, Poland

3Faculty of Chemistry, Adam Mickiewicz University, Poznań, Poland

4Laboratory of Experimental Animals, Poznan University of Medical Sciences, Poznań, Poland

5Department of Histology and Embryology, Poznan University of Medical Sciences, Poznań, Poland

6Department of Computer Science and Statistics, Poznan University of Medical Sciences, Poznań, Poland

7Centre for Advanced Technologies, Adam Mickiewicz University, Poznań, Poland

Correspondence: Marta Szukalska, Ph.D.

Laboratory of Environmental Research, Department of Toxicology, Poznan University of Medical Sciences, Rokietnicka 3 Street, 60-806 Poznan, Poland

Email: martan@ump.edu.pl


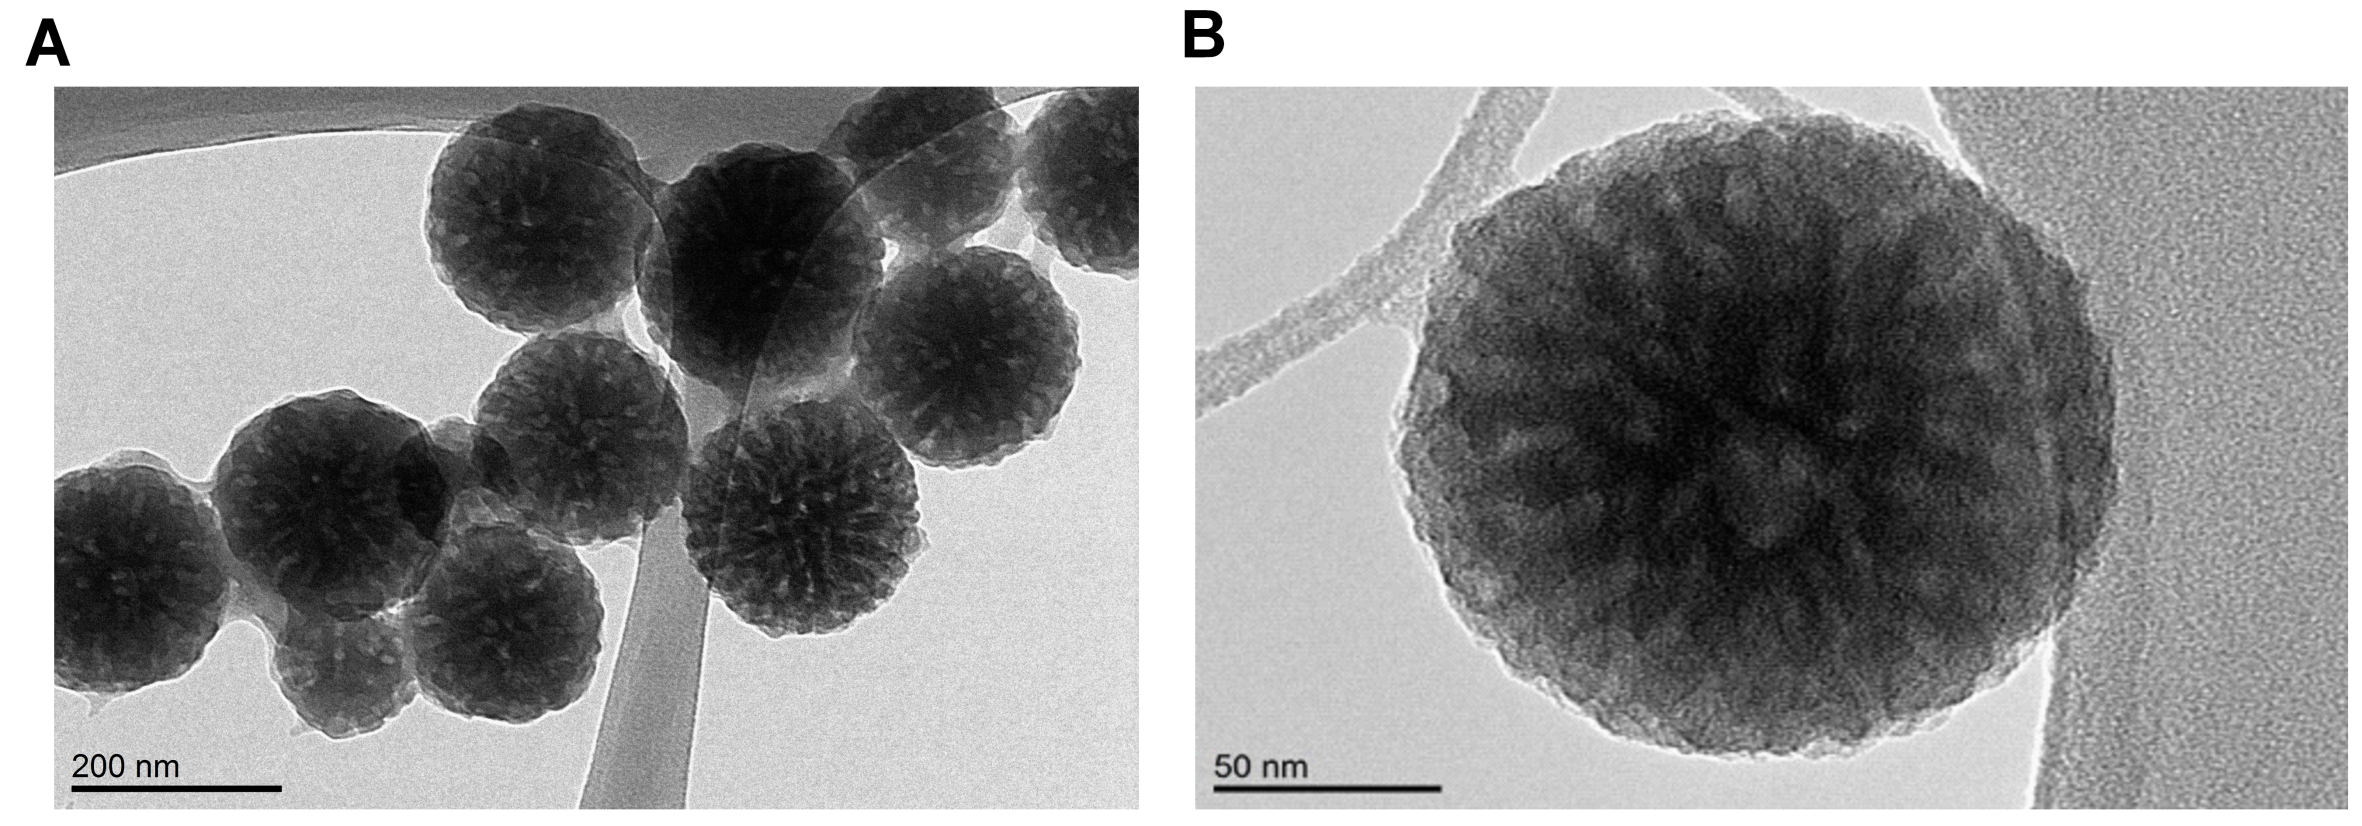


Figure S1. TEM images of MPDAFe NPs.

**Table S1**. Z-avarege, PDI and Zeta potential values of MPDAFe NPs

| **Sample** | **Z-average/(d.nm)**​​ | **PDI**​ | **Zeta potential/(mV)**​ |
| --- | --- | --- | --- |
| MPDAFe | 251.0 ± 13.4 | 0.13 | -22.7 ± 4.3 |
| Vesicles | 312.4 ± 98.4 | 0.40 | -43.9 ± 5.7 |
| MPDAFe@Mem | 263.2 ± 5.2 | 0.11 | -41.2 ± 1.5 |


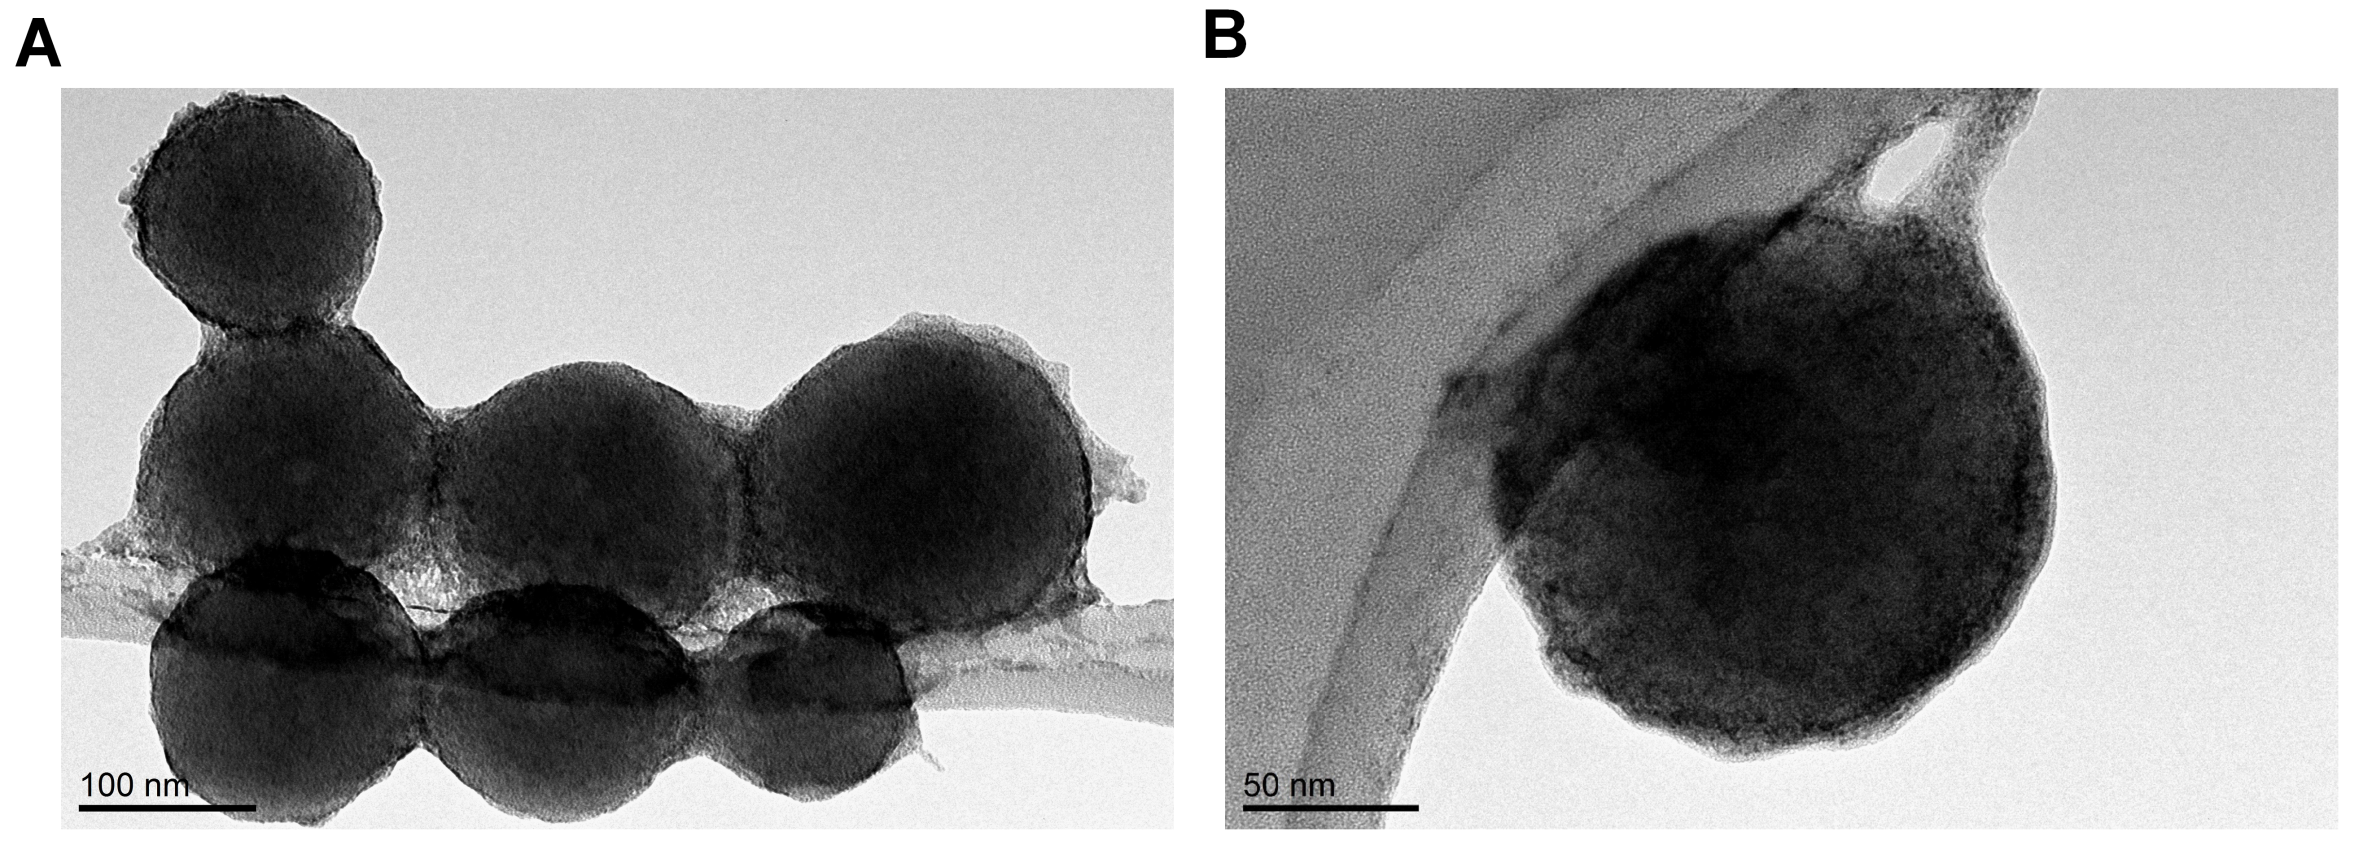


Figure S2. TEM images of MPDAFe@Mem NPs.


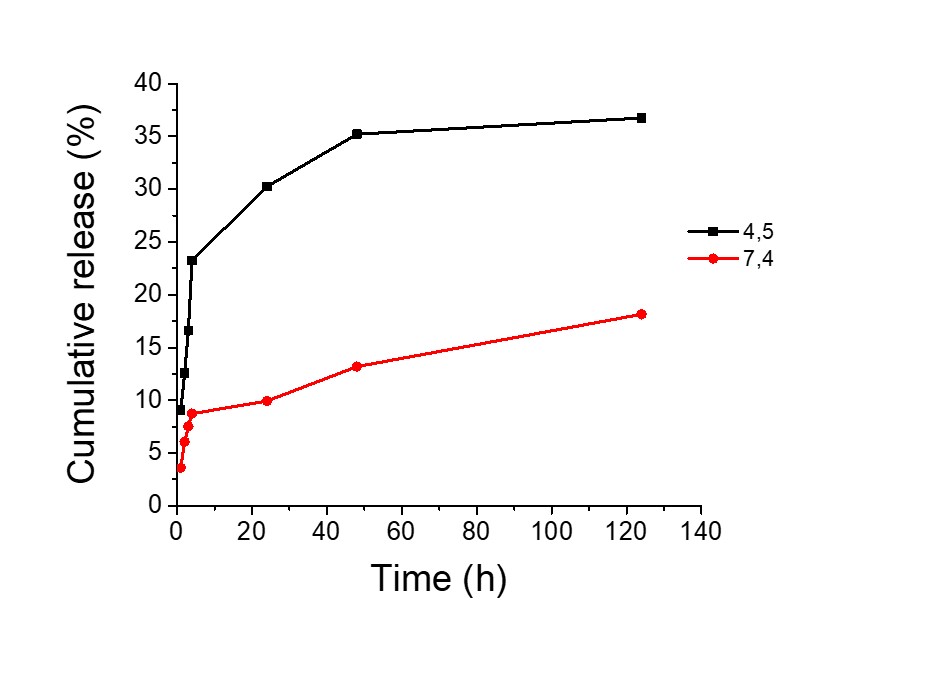


Figure S3. Release profile of DOX from MPDAFe@DOX NPs for 124 h at different pH.


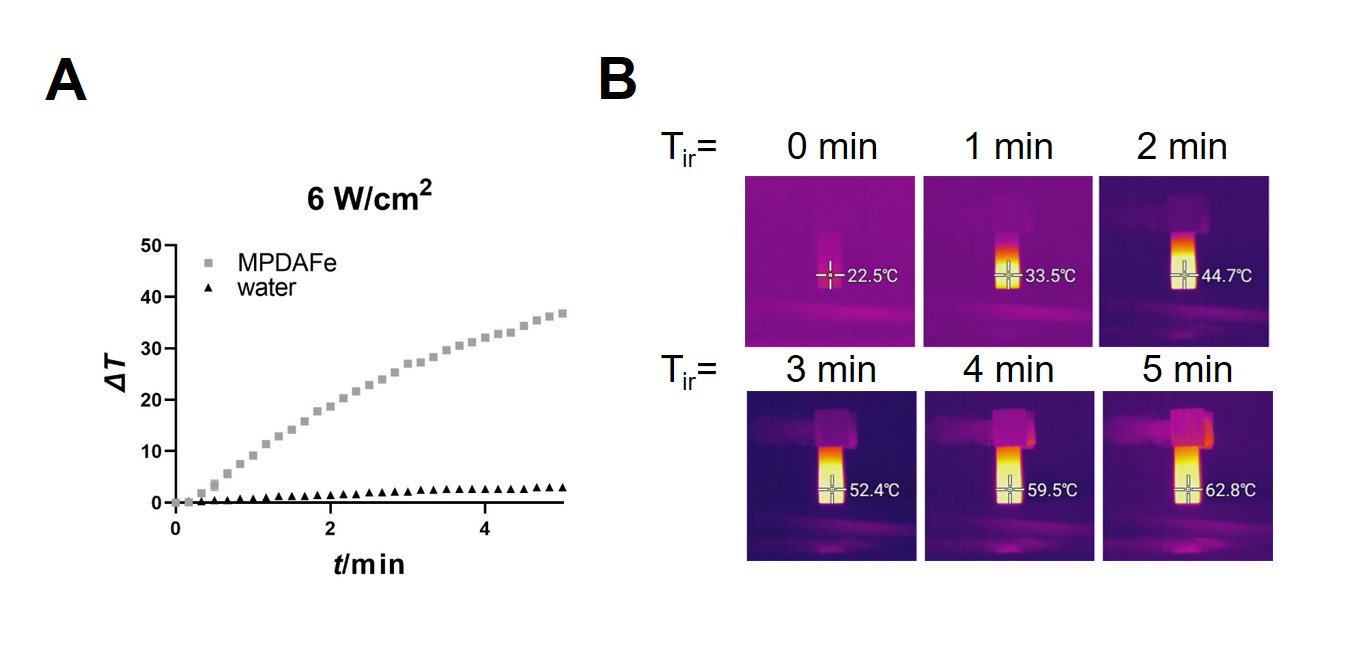


Figure S4. Temperature increase (A), and thermographic camera images (B) of the MPDAFe NPs solution after irradiation with 808 nm laser.
